# Supplementary material for: The Molecular Mechanism Underlying the Therapeutic Effect of Dihydromyricetin on Type 2 Diabetes Mellitus Based on Network Pharmacology, Molecular Docking, and Transcriptomics
Source: MDPI journal article supplement (doi:10.3390/foods13020344), 2024-01-22
Supplement: s1 [file s1]

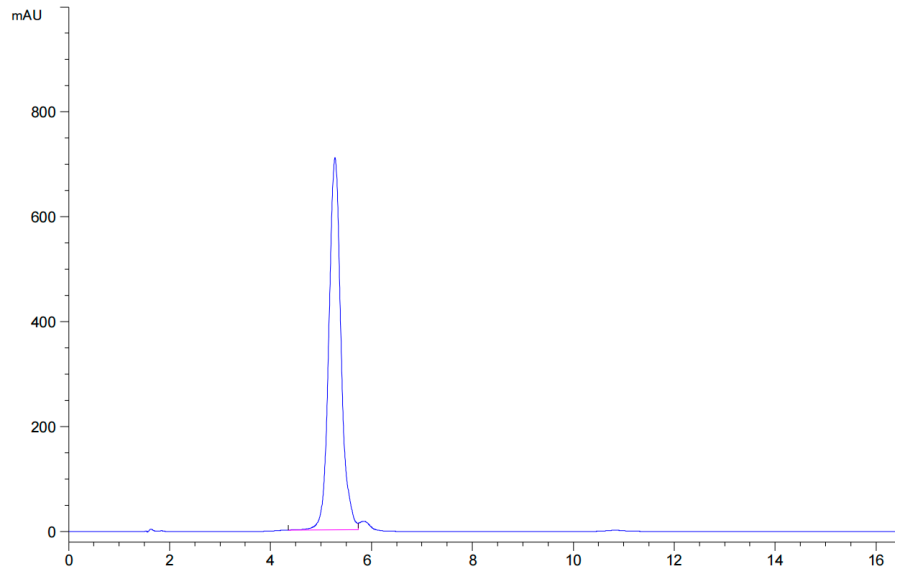

**Figure S1.** Quantification of DHM content by using HPLC.

**Table S1.** List of primer sequences.

| Gene Name     | Primer Sequences (5'—3')                                 |
|---------------|----------------------------------------------------------|
| <i>VEGFA</i>  | F: TTGCCTTGCTGCTCTACCTCCA<br>R: GATGGCAGTAGCTGCGTGATA    |
| <i>MAPK14</i> | F:GAGCGTTACCAGAACCTGTCTC<br>R:AGTAACCGCAGTTCTCTGTAGGT    |
| <i>HIF1A</i>  | F:TATGAGCCAGAAGAACTTTTAGGC<br>R: CACCTCTTTTGGCAAGCATCCTG |
| <i>KDR</i>    | F:GGAACCTCACTATCCGCAGAGT<br>R:CCAAGTTCGTCTTTTCCTGGGC     |
| <i>MET</i>    | F:TGCACAGTTGGTCCTGCCATGA<br>R:CAGCCATAGGACCGTATTTCCG     |

**Table S2.** The topology analysis of PPI network.

|    | Gene name | Betweenness | Closeness  | Degree |
|----|-----------|-------------|------------|--------|
| 1  | VEGFA     | 128.45741   | 0.8        | 48     |
| 2  | SRC       | 138.58505   | 0.7619048  | 46     |
| 3  | HIF1A     | 88.57314    | 0.7619048  | 46     |
| 4  | ESR1      | 93.6636     | 0.72727275 | 42     |
| 5  | KDR       | 20.187223   | 0.6666667  | 34     |
| 6  | MMP9      | 37.36483    | 0.6666667  | 34     |
| 7  | PPARG     | 80.0737     | 0.6666667  | 32     |
| 8  | MAPK14    | 77.58244    | 0.6530612  | 30     |
| 9  | KIT       | 5.0702105   | 0.58181816 | 24     |
| 10 | MET       | 5.1237907   | 0.58181816 | 24     |
| 11 | APP       | 61.06575    | 0.6037736  | 24     |
| 12 | MMP2      | 4.7783885   | 0.6037736  | 24     |
| 13 | SERPINE1  | 17.940353   | 0.5925926  | 24     |
| 14 | STAT1     | 2.1776557   | 0.5714286  | 20     |
| 15 | ABCG2     | 8.20901     | 0.55172414 | 18     |
| 16 | MMP14     | 3.4539683   | 0.55172414 | 18     |
| 17 | ESR2      | 10.915079   | 0.5614035  | 18     |
| 18 | TERT      | 3.8014653   | 0.55172414 | 18     |
| 19 | FGFR1     | 0.78571427  | 0.5423729  | 18     |
| 20 | ABCB1     | 6.676083    | 0.5423729  | 16     |

|    |         |            |            |    |
|----|---------|------------|------------|----|
| 21 | PPARA   | 2.4277778  | 0.55172414 | 16 |
| 22 | CYP19A1 | 6.825275   | 0.53333336 | 14 |
| 23 | MMP13   | 1.4611111  | 0.53333336 | 14 |
| 24 | DNMT1   | 0.83956045 | 0.50793654 | 12 |
| 25 | CES1    | 1.5660173  | 0.45070422 | 8  |
| 26 | MAPT    | 8.884127   | 0.4923077  | 8  |
| 27 | SHBG    | 0.6666667  | 0.47058824 | 8  |
| 28 | PLA2G1B | 25.571428  | 0.45714286 | 8  |
| 29 | PTGS1   | 37.27316   | 0.4848485  | 8  |
| 30 | ACHE    | 0          | 0.38554215 | 4  |
| 31 | BCL2    | 0          | 0.45714286 | 4  |
| 32 | PLA2G2A | 0          | 0.34408602 | 4  |
| 33 | KCNH2   | 0          | 0.43835616 | 2  |

---
